# Supplementary material for: The burden of cancer attributable to modifiable risk factors: the Australian cancer-PAF cohort consortium
Source: PubMed Central journal article supplement — BMJ Open. 2017 Jun 14;7(6):e016178. doi: 10.1136/bmjopen-2017-016178 (PMC5726120; doi:10.1136/bmjopen-2017-016178), 2017-06-14
Supplement: bmjopen-2017-016178supp001.pdf [file bmjopen-2017-016178supp001.pdf]

**Supplementary Table 1.** Prevalence (%) of main lifestyle-related risk factors for cancer by age group across cohort studies and external prevalence data sources

| RISK FACTORS                                        | AGE   | MEN         |         |         |         |         |         |                 |      |         | WOMEN       |         |       |         |         |         |                 |      |         |
|-----------------------------------------------------|-------|-------------|---------|---------|---------|---------|---------|-----------------|------|---------|-------------|---------|-------|---------|---------|---------|-----------------|------|---------|
|                                                     |       | COHORT DATA |         |         |         |         |         | PREVALENCE DATA |      |         | COHORT DATA |         |       |         |         |         | PREVALENCE DATA |      |         |
|                                                     |       | MCCS        | BMES    | AusDiab | NWAHS   | CHAMP   | 45&Up   | NHS1            | NHS2 | NHS3    | MCCS        | BMES    | ALSWH | AusDiab | NWAHS   | 45&Up   | NHS1            | NHS2 | NHS3    |
|                                                     |       | 1990-94     | 1992-93 | 1999-01 | 1999-03 | 2005-07 | 2005-08 | 2001            | 2004 | 2014-15 | 1990-94     | 1992-93 | 1996  | 1999-01 | 1999-03 | 2005-08 | 2001            | 2004 | 2014-15 |
| Smoking                                             |       |             |         |         |         |         |         |                 |      |         |             |         |       |         |         |         |                 |      |         |
| Former regular                                      | < 35  | -           | -       | 17      | 16      | -       | -       | 13              | 14   | 17      | -           | -       | 15    | 18      | 26      | -       | 17              | 17   | 15      |
|                                                     | 35-44 | 33          | -       | 26      | 33      | -       | -       | 27              | 23   | 27      | 26          | -       | -     | 27      | 36      | -       | 25              | 23   | 26      |
|                                                     | 45-54 | 39          | 38      | 32      | 38      | -       | 33      | 33              | 33   | 32      | 22          | 27      | 28    | 22      | 30      | 31      | 24              | 25   | 28      |
|                                                     | 55-64 | 48          | 47      | 44      | 45      | -       | 42      | 45              | 42   | 44      | 20          | 24      | -     | 22      | 34      | 29      | 25              | 28   | 31      |
|                                                     | 65-74 | 58          | 61      | 51      | 58      | 55      | 50      | 57              | 56   | 50      | 22          | 26      | 30    | 27      | 30      | 28      | 24              | 26   | 33      |
|                                                     | ≥ 75  | -           | 57      | 56      | 66      | 58      | 52      | 62              | 66   | 56      | -           | 26      | 30    | 20      | 24      | 22      | 25              | 25   | 29      |
| Current regular                                     | < 35  | -           | -       | 20      | 28      | -       | -       | 32              | 30   | 19      | -           | -       | 21    | 18      | 22      | -       | 25              | 23   | 13      |
|                                                     | 35-44 | 18          | -       | 23      | 31      | -       | -       | 30              | 29   | 20      | 12          | -       | -     | 16      | 24      | -       | 24              | 23   | 13      |
|                                                     | 45-54 | 16          | 21      | 18      | 24      | -       | 12      | 23              | 25   | 20      | 11          | 20      | 15    | 14      | 17      | 11      | 19              | 20   | 16      |
|                                                     | 55-64 | 14          | 22      | 13      | 15      | -       | 9       | 21              | 19   | 17      | 8           | 17      | -     | 9       | 13      | 7       | 14              | 13   | 12      |
|                                                     | 65-74 | 10          | 12      | 9       | 11      | 8       | 5       | 12              | 11   | 11      | 6           | 11      | 6     | 6       | 7       | 4       | 9               | 8    | 7       |
|                                                     | ≥ 75  | -           | 7       | 6       | 5       | 5       | 2       | 7               | 6    | 3       | -           | 8       | 4     | 3       | 4       | 2       | 4               | 4    | 4       |
| Alcohol consumption                                 |       |             |         |         |         |         |         |                 |      |         |             |         |       |         |         |         |                 |      |         |
| > 2 drinks/day                                      | < 35  | -           | -       | 24      | 17      | -       | -       | 30              | 33   | 23      | -           | -       | 6     | 6       | 3       | -       | 8               | 12   | 7       |
|                                                     | 35-44 | 26          | -       | 27      | 15      | -       | -       | 29              | 34   | 28      | 10          | -       | -     | 8       | 4       | -       | 10              | 13   | 10      |
|                                                     | 45-54 | 29          | 30      | 28      | 20      | -       | 25      | 33              | 36   | 28      | 10          | 7       | 5     | 8       | 4       | 8       | 10              | 13   | 11      |
|                                                     | 55-64 | 30          | 22      | 31      | 21      | -       | 27      | 27              | 35   | 31      | 7           | 5       | -     | 10      | 4       | 7       | 9               | 14   | 10      |
|                                                     | 65-74 | 29          | 17      | 30      | 17      | 18      | 24      | 24              | 29   | 27      | 8           | 5       | 3     | 5       | 2       | 5       | 7               | 9    | 11      |
|                                                     | ≥ 75  | -           | 14      | 16      | 11      | 12      | 16      | 21              | 17   | 15      | -           | 3       | 2     | 1       | 3       | 3       | 5               | 6    | 8       |
| Body fatness (BMI; kg/m <sup>2</sup> ) <sup>1</sup> |       |             |         |         |         |         |         |                 |      |         |             |         |       |         |         |         |                 |      |         |
| 25.0-29.9                                           | < 35  | -           | -       | 42      | 31      | -       | -       | 35              | 37   | 36      | -           | -       | 15    | 24      | 21      | -       | 18              | 22   | 22      |
|                                                     | 35-44 | 49          | -       | 48      | 47      | -       | -       | 43              | 47   | 47      | 28          | -       | -     | 26      | 27      | -       | 23              | 26   | 28      |
|                                                     | 45-54 | 53          | 49      | 51      | 51      | -       | 47      | 46              | 46   | 47      | 35          | 37      | 29    | 33      | 31      | 30      | 28              | 30   | 29      |
|                                                     | 55-64 | 55          | 48      | 49      | 49      | -       | 48      | 49              | 48   | 45      | 40          | 33      | -     | 38      | 37      | 34      | 35              | 34   | 33      |
|                                                     | 65-74 | 55          | 47      | 53      | 52      | 48      | 49      | 47              | 43   | 42      | 40          | 38      | 33    | 39      | 42      | 36      | 34              | 35   | 36      |
|                                                     | ≥ 75  | -           | 37      | 53      | 50      | 49      | 43      | 39              | 40   | 45      | -           | 29      | 31    | 42      | 42      | 33      | 29              | 30   | 40      |
| ≥ 30.0                                              | < 35  | -           | -       | 19      | 18      | -       | -       | 11              | 14   | 20      | -           | -       | 6     | 15      | 19      | -       | 12              | 12   | 17      |
|                                                     | 35-44 | 14          | -       | 19      | 30      | -       | -       | 19              | 23   | 27      | 15          | -       | -     | 21      | 29      | -       | 16              | 17   | 31      |
|                                                     | 45-54 | 18          | 19      | 22      | 31      | -       | 24      | 20              | 25   | 33      | 21          | 19      | 19    | 25      | 38      | 23      | 21              | 20   | 33      |
|                                                     | 55-64 | 22          | 14      | 26      | 33      | -       | 25      | 19              | 24   | 37      | 26          | 25      | -     | 29      | 38      | 26      | 24              | 24   | 35      |
|                                                     | 65-74 | 19          | 15      | 21      | 31      | 32      | 22      | 15              | 17   | 38      | 22          | 19      | 14    | 29      | 34      | 24      | 21              | 22   | 33      |
|                                                     | ≥ 75  | -           | 9       | 12      | 14      | 24      | 12      | 10              | 11   | 28      | -           | 12      | 12    | 17      | 28      | 16      | 13              | 13   | 26      |

| RISK FACTORS                                     | AGE   | MEN             |                 |                    |                  |                  |                  |                 |              |                 | WOMEN           |                 |               |                    |                  |                  |                 |              |                 |
|--------------------------------------------------|-------|-----------------|-----------------|--------------------|------------------|------------------|------------------|-----------------|--------------|-----------------|-----------------|-----------------|---------------|--------------------|------------------|------------------|-----------------|--------------|-----------------|
|                                                  |       | COHORT DATA     |                 |                    |                  |                  |                  | PREVALENCE DATA |              |                 | COHORT DATA     |                 |               |                    |                  |                  | PREVALENCE DATA |              |                 |
|                                                  |       | MCCS<br>1990-93 | BMES<br>1992-93 | AusDiab<br>1999-01 | NWAHS<br>1999-03 | CHAMP<br>2005-07 | 45&Up<br>2005-08 | NHS1<br>2001    | NHS2<br>2004 | NHS3<br>2014-15 | MCCS<br>1990-93 | BMES<br>1992-93 | ALSWH<br>1996 | AusDiab<br>1999-01 | NWAHS<br>1999-03 | 45&Up<br>2005-08 | NHS1<br>2001    | NHS2<br>2004 | NHS3<br>2014-15 |
| Physical activity<br>< 150 min/week <sup>2</sup> | < 35  | ~               | -               | 40                 | 53               | ~                | -                | 41              | 41           | 56              | ~               | -               | ~             | 57                 | 79               | -                | 58              | 56           | 71              |
|                                                  | 35-44 | ~               | -               | 47                 | 70               | ~                | -                | 49              | 57           | 69              | ~               | -               | ~             | 59                 | 81               | -                | 64              | 63           | 77              |
|                                                  | 45-54 | ~               | 56              | 51                 | 73               | ~                | 35               | 51              | 64           | 70              | ~               | 64              | ~             | 65                 | 85               | 33               | 62              | 68           | 79              |
|                                                  | 55-64 | ~               | 52              | 54                 | 75               | ~                | 35               | 47              | 69           | 77              | ~               | 56              | ~             | 62                 | 84               | 30               | 54              | 70           | 84              |
|                                                  | 65-74 | ~               | 50              | 51                 | 74               | ~                | 33               | 51              | 68           | 83              | ~               | 54              | ~             | 65                 | 82               | 29               | 58              | 73           | 86              |
|                                                  | ≥ 75  | ~               | 51              | 56                 | 75               | ~                | 43               | 43              | 80           | 89              | ~               | 60              | ~             | 71                 | 87               | 45               | 51              | 83           | 95              |
| Fruit consumption<br>< 2 serves/day              | < 35  | -               | -               | 72                 | -                | -                | -                | 61              | 61           | 61              | -               | -               | -             | 65                 | -                | -                | 50              | 48           | 50              |
|                                                  | 35-44 | 23              | -               | 67                 | -                | -                | -                | 57              | 57           | 57              | 15              | -               | -             | 59                 | -                | -                | 47              | 44           | 51              |
|                                                  | 45-54 | 20              | 62              | 60                 | -                | -                | 53               | 53              | 50           | 59              | 12              | 61              | -             | 47                 | -                | 42               | 39              | 39           | 44              |
|                                                  | 55-64 | 19              | 67              | 56                 | -                | -                | 50               | 47              | 44           | 53              | 11              | 58              | -             | 39                 | -                | 34               | 30              | 30           | 40              |
|                                                  | 65-74 | 19              | 61              | 51                 | -                | -                | 48               | 39              | 38           | 48              | 10              | 59              | -             | 34                 | -                | 30               | 31              | 32           | 31              |
|                                                  | ≥ 75  | -               | 64              | 48                 | -                | -                | 45               | 38              | 38           | 42              | -               | 65              | -             | 30                 | -                | 32               | 32              | 30           | 38              |
| Vegetable consumption<br>< 5 serves/day          | < 35  | -               | -               | 94                 | -                | -                | -                | 79              | 92           | 93              | -               | -               | -             | 88                 | -                | -                | 75              | 88           | 91              |
|                                                  | 35-44 | 55              | -               | 93                 | -                | -                | -                | 75              | 88           | 93              | 37              | -               | -             | 84                 | -                | -                | 67              | 85           | 91              |
|                                                  | 45-54 | 54              | 43              | 92                 | -                | -                | 81               | 70              | 87           | 93              | 35              | 42              | -             | 82                 | -                | 66               | 63              | 81           | 89              |
|                                                  | 55-64 | 52              | 47              | 90                 | -                | -                | 77               | 68              | 83           | 90              | 38              | 38              | -             | 82                 | -                | 59               | 57              | 77           | 89              |
|                                                  | 65-74 | 52              | 37              | 90                 | -                | -                | 72               | 66              | 81           | 89              | 39              | 37              | -             | 83                 | -                | 55               | 60              | 79           | 85              |
|                                                  | ≥ 75  | -               | 36              | 90                 | -                | -                | 73               | 64              | 83           | 88              | -               | 39              | -             | 87                 | -                | 61               | 61              | 86           | 91              |

~ (not comparable); - (not available)

45&Up (45 and Up Study); ALSWH (Australian Longitudinal Study on Women's Health); AusDiab (Australian Diabetes, Obesity and Lifestyle Study); BMES (Blue Mountains Eye Study); BMI (Body Mass Index); CHAMP (Concord Health and Ageing in Men Project); MCCS (Melbourne Collaborative Cohort Study); NHS (National Health Survey); NWAHS (North West Adelaide Health Study)

<sup>1</sup> Measured weight and height (MCCS, AusDiab, NWAHS, CHAMP, NHS3); self-reported weight and height (BMES, ALSWH, 45&Up, NHS1, NHS2, LADY)

<sup>2</sup> ≥ 150 min/week of moderate activity or ≥ 75 min/week of vigorous activity or combination of the two

**Supplementary Table 2.** Total number of incident cancers and deaths, and the 20 most common cancer sites, by sex over entire follow-up period to 31 December 2012

| <b>CANCER SITE</b>                    | <b>MEN</b> | <b>WOMEN</b> |
|---------------------------------------|------------|--------------|
| Prostate (C61)                        | 6,651      | -            |
| Breast (C50)                          | 30         | 4,886        |
| Colorectal (C18-C20)                  | 2,199      | 2,550        |
| Melanoma (C43)                        | 2,044      | 1,811        |
| Lung (C33-C34)                        | 1,389      | 1,273        |
| Non-Hodgkin lymphoma (C82-C86, C91.1) | 866        | 919          |
| Pancreas (C25)                        | 377        | 464          |
| Uterus (C54-C55)                      | -          | 795          |
| Cancer of unknown primary (C76-C80)   | 333        | 426          |
| Kidney (C64)                          | 404        | 312          |
| Bladder (C67)                         | 525        | 185          |
| Stomach (C16)                         | 367        | 264          |
| Leukemia (C91-C95, excluding C91.1)   | 303        | 264          |
| Multiple myeloma (C90)                | 273        | 245          |
| Ovary (C56)                           | -          | 484          |
| Brain (C71)                           | 247        | 224          |
| Thyroid (C73)                         | 93         | 339          |
| Myelodysplastic syndromes (D46)       | 232        | 170          |
| Oesophagus (C15)                      | 207        | 152          |
| Liver (C22)                           | 210        | 111          |
| ALL CANCERS                           | 18,369     | 17,491       |
| DEATHS                                | 15,011     | 17,096       |

**Supplementary Table 3.** Numbers of incident cancers causally related to body fatness or both tobacco and alcohol consumption according to the International Agency for Research on Cancer during 10-years follow-up of 365,173 participants

| Cancer site                                     | Number of body fatness–related incident cancers <sup>1</sup> | Number of tobacco- and alcohol–related incident cancers <sup>2</sup> |
|-------------------------------------------------|--------------------------------------------------------------|----------------------------------------------------------------------|
| Tongue (C01-C02)                                |                                                              | 117                                                                  |
| Mouth (C03-C06)                                 |                                                              | 95                                                                   |
| Oropharynx (C10)                                |                                                              | 17                                                                   |
| Hypopharynx (C12-C13)                           |                                                              | 17                                                                   |
| Other sites in pharynx (C14)                    |                                                              | 12                                                                   |
| Oesophagus (C15)                                |                                                              | 243                                                                  |
| Adenocarcinoma <sup>3</sup>                     | 126                                                          |                                                                      |
| Stomach (C16)                                   | 427                                                          |                                                                      |
| Colorectal (C18-C20)                            | 3,321                                                        | 3,454                                                                |
| Liver (C22)                                     | 218                                                          | 226                                                                  |
| Gallbladder (C23)                               | 65                                                           |                                                                      |
| Pancreas (C25)                                  | 578                                                          |                                                                      |
| Larynx (C32)                                    |                                                              | 102                                                                  |
| Breast (C50), postmenopausal                    | 2,619                                                        |                                                                      |
| Corpus uteri (C54)                              | 448                                                          |                                                                      |
| Ovary (C56)                                     | 311                                                          |                                                                      |
| Kidney (C64), renal-cell carcinoma <sup>4</sup> | 478                                                          |                                                                      |
| Meningioma (C70)                                | 8                                                            |                                                                      |
| Thyroid (C73)                                   | 299                                                          |                                                                      |
| Multiple myeloma (C90)                          | 361                                                          |                                                                      |
| <b>TOTAL</b>                                    | <b>9,258</b>                                                 | <b>4,283</b>                                                         |

<sup>1</sup> Participants diagnosed with body fatness–related cancer (Lauby-Secretan et al. 2016) prior to baseline (n = 14,029) excluded

<sup>2</sup> Participants diagnosed with tobacco- and alcohol–related cancer (IARC 2012) prior to baseline (n = 5,367) excluded

<sup>3</sup> Histology codes 8140-8576

<sup>4</sup> Histology codes 8050, 8140, 8260, 8270, 8280-8312, 8316-8320, 8340-8344

**SupplementaryTable 4.** Cohort-specific hazard ratios for cancers causally related to body fatness or both tobacco and alcohol over 10-years follow-up

| <b>Risk factors</b>                                 | <b>MCCS<br/>HR (95% CI)<sup>1</sup></b> | <b>BMES<br/>HR (95% CI)<sup>1</sup></b> | <b>ALSWH<br/>HR (95% CI)<sup>1</sup></b> | <b>AusDiab<br/>HR (95% CI)<sup>1</sup></b> | <b>NWAHS<br/>HR (95% CI)<sup>1</sup></b> | <b>CHAMP<br/>HR (95% CI)<sup>1</sup></b> | <b>45&amp;Up<br/>HR (95% CI)<sup>1</sup></b> | <b>P<sup>2</sup></b> |
|-----------------------------------------------------|-----------------------------------------|-----------------------------------------|------------------------------------------|--------------------------------------------|------------------------------------------|------------------------------------------|----------------------------------------------|----------------------|
| Body fatness (BMI; kg/m <sup>2</sup> ) <sup>3</sup> |                                         |                                         |                                          |                                            |                                          |                                          |                                              |                      |
| Healthy weight (18.5-24.9)                          | 1                                       | 1                                       | 1                                        | 1                                          | 1                                        | 1                                        | 1                                            |                      |
| Overweight (25.0-29.9)                              | 1.16 (1.03, 1.31)                       | 1.44 (1.03, 2.00)                       | 1.09 (0.95, 1.26)                        | 1.25 (0.95, 1.64)                          | 1.64 (1.02, 2.62)                        | 1.03 (0.57, 1.86)                        | 1.09 (1.03, 1.17)                            | 0.37                 |
| Obese (≥ 30.0)                                      | 1.39 (1.22, 1.60)                       | 1.73 (1.17, 2.57)                       | 1.50 (1.27, 1.77)                        | 1.58 (1.18, 2.13)                          | 2.10 (1.31, 3.36)                        | 1.15 (0.61, 2.19)                        | 1.28 (1.20, 1.38)                            | 0.13                 |
| Smoking <sup>4</sup>                                |                                         |                                         |                                          |                                            |                                          |                                          |                                              |                      |
| Never regular                                       | 1                                       | 1                                       | 1                                        | 1                                          | 1                                        | 1                                        | 1                                            |                      |
| Former regular                                      | 1.27 (1.07, 1.50)                       | 1.04 (0.51, 2.11)                       | 0.94 (0.75, 1.17)                        | 1.28 (0.90, 1.81)                          | 1.47 (0.81, 2.69)                        | 0.97 (0.56, 1.69)                        | 1.35 (1.24, 1.46)                            | 0.09                 |
| Current regular                                     | 1.60 (1.28, 2.01)                       | 1.43 (0.90, 2.26)                       | 1.27 (0.90, 1.78)                        | 1.18 (0.70, 1.96)                          | 1.50 (0.64, 3.49)                        | 0.96 (0.29, 3.24)                        | 1.86 (1.62, 2.14)                            | 0.24                 |
| Alcohol consumption <sup>4</sup>                    |                                         |                                         |                                          |                                            |                                          |                                          |                                              |                      |
| ≤ 2 drinks/day                                      | 1                                       | 1                                       | 1                                        | 1                                          | 1                                        | 1                                        | 1                                            |                      |
| > 2 drinks/day                                      | 1.37 (1.14, 1.64)                       | 1.22 (0.65, 2.28)                       | 1.59 (1.06, 2.38)                        | 1.77 (1.15, 2.72)                          | 1.60 (0.73, 3.48)                        | 1.74 (0.91, 3.32)                        | 1.35 (1.22, 1.49)                            | 0.84                 |

45&Up (45 and Up Study); ALSWH (Australian Longitudinal Study on Women's Health); AusDiab (Australian Diabetes, Obesity and Lifestyle Study); BMES (Blue Mountains Eye Study); CHAMP (Concord Health and Ageing in Men Project); MCCS (Melbourne Collaborative Cohort Study); NWAHS (North West Adelaide Health Study)

<sup>1</sup> Adjusted for age and sex

<sup>2</sup> P value for heterogeneity between the study-specific HRs tested using the asymptotic DerSimonian and Laird Q statistic

<sup>3</sup> Cancers causally related to body fatness are oesophageal adenocarcinoma (C15, histology codes 8140-8576), cancers of stomach (C16), colon (C18), rectum (C19-20), liver (C22), gallbladder (C23), and pancreas (C25), postmenopausal breast cancer (C50), cancers of corpus uteri (C54) and ovary (C56), renal-cell carcinoma (C64, histology codes 8050, 8140, 8260, 8270, 8280-8312, 8316-8320, 8340-8344), meningioma (C70), thyroid cancer (C73) and multiple myeloma (C90)

<sup>4</sup> Cancers causally related to both tobacco and alcohol are cancers of tongue (C01-02), mouth (C03-C06), oropharynx (C10), hypopharynx (C12-C13), other sites in pharynx (C14), oesophagus (C15), colon (C18-C19), rectum (C20), liver (C22) and larynx (C32)
